# Supplementary material
Source: PubMed Central journal article supplement (PMC3578124)
Supplement: NIHMS435086-supplement-Suppl.pdf [file NIHMS435086-supplement-Suppl.pdf]

## Supplemental Materials

**Table S1.** RT-PCR primers sequence.

| No. | Gene Name      | Forward primer                     | Reverse primer                         | Band size, bp |
|-----|----------------|------------------------------------|----------------------------------------|---------------|
| 1   | IL-7R $\alpha$ | TAC TTC AAA GGC TTC TGG<br>AG      | TTC GGG ATT GAA ACT CAC AT             | 266           |
| 2   | FoxP1          | CAG TAT GGA CAG TGG ATG<br>AAG TAG | GTT GGC TGT TGT CAC TAA<br>GGA C       | 374           |
| 3   | Cxcr4          | ACG ACA GTC ATC CTC ATC<br>CT      | GAA AGG ATC TTG AGG CTG<br>GA          | 272           |
| 4   | Pax5           | GAG GTG CTG GAC CGC GTG<br>T       | GAA TAC TGA GGG TGG CTG<br>TAG G       | 353           |
| 5   | EBF1           | GAG GCA TCA CAA GCC ACC<br>AAT CA  | TGT TCC CGT TGG TGC TGG<br>TGC A       | 401           |
| 6   | Sox4           | CGA TCG CCC GCT GAC CAC<br>CG      | TCA GTA GGT GAA GAC CAG<br>GTT AGA GAT | 363           |
| 7   | Ezh2           | GCC AGA CTG GGA AGA AAT<br>CTG     | TGT GCT GGA AAA TCC AAG                | 277           |
| 8   | E2A            | GCA CTG GCC TCG ATC TAC<br>TCC     | TTC TCC TCC CGC TTG ATC TCG<br>C       | 503           |
| 9   | Mcl1           | TCA AAG ATG GCG TAA CAA<br>ACT GG  | CCC GTT TCG TCC TTA CAA<br>GAA C       | 150           |
| 10  | Stat5a         | GTG AAG CGC TCA ACA TGA<br>AA      | CGG TCT GGG AAC ACG TAG<br>AT          | 496           |
| 11  | Rag1           | TGC AGA CAT TCT AGC ACT<br>CTG G   | ACA TCT GCC TTC ACG TCG AT             | 554           |
| 12  | Bcl2           | TCG CTA CCG TCG TGA CTT C          | AAA CAG AGG TCG CAT GCT G              | 313           |
| 13  | Actin          | CTC TAG ACT TCG AGC AGG<br>AGA     | TCG TAC TCC TGC TTG CTG<br>ATC         | 430           |
